# Supplementary material
Source: PubMed Central journal article supplement (PMC2234170)
Supplement: pnas_0711500105_4.pdf [file pnas_0711500105_4.pdf]

**Table 2.**  $^{13}\text{C}$  and  $^{15}\text{N}$  chemical shifts (ppm) of M2TMP in DLPC bilayers at 243 K without and with amantadine (Amt). Sites with chemical-shift differences greater than 0.5 ppm are bolded. The letters s, m, w denote strong, medium, and weak intensities when more than one peak is observed. The  $^{13}\text{C}$  and  $^{15}\text{N}$  shifts are referenced to TMS and liquid  $\text{NH}_3$ , respectively.

| Residue      | Site         | - Amt        | + Amt               |
|--------------|--------------|--------------|---------------------|
| L26          | N            | 117.7        | 117.5               |
|              | CO           | -            | -                   |
|              | C $\alpha$   | 55.4         | 55.4                |
|              | C $\beta$    | 39.7         | 39.4                |
|              | C $\gamma$   | 25.2         | 25.1                |
|              | C $\delta$ 1 | 22.3         | 22.4                |
|              | C $\delta$ 2 | 21.2         | 21.3                |
|              | V27          | N            | 120.4               |
| CO           |              | <b>177.9</b> | <b>178.6</b>        |
| C $\alpha$   |              | <b>63.8</b>  | <b>62.8</b>         |
| C $\beta$    |              | 29.8         | 30.1                |
| C $\gamma$ 1 |              | <b>21.0</b>  | <b>20.0</b>         |
| C $\gamma$ 2 |              | 19.5         | 19.9                |
| A29          | N            | <b>120.9</b> | <b>121.7</b>        |
|              | CO           | -            | -                   |
|              | C $\alpha$   | 53.3         | 53.2                |
|              | C $\beta$    | 16.7         | 16.5                |
| A30          | N            | 118.7        | 118.4               |
|              | CO           | 180.4        | 180.0               |
|              | C $\alpha$   | 52.8         | 52.9                |
|              | C $\beta$    | <b>16.5</b>  | <b>17.2</b>         |
| I33          | N            | <b>120.2</b> | <b>118.8</b>        |
|              | CO           | 178.8        | 178.7               |
|              | C $\alpha$   | 63.3         | 63.1                |
|              | C $\beta$    | 35.7         | 35.5                |
|              | C $\gamma$ 1 | <b>28.6</b>  | <b>30.1</b>         |
|              | C $\gamma$ 2 | <b>15.1</b>  | <b>16.0</b>         |
|              | C $\delta$   | 11.8         | 12.2                |
| G34          | N            | <b>107.1</b> | <b>106.3, 109.7</b> |
|              | CO           | <b>173.5</b> | <b>175.7</b>        |
|              | C $\alpha$   | <b>45.6</b>  | 45.9, <b>44.8</b>   |
| I35          | N            | <b>122.3</b> | <b>124.6</b>        |
|              | CO           | <b>175.4</b> | <b>176.9</b>        |
|              | C $\alpha$   | 63.8         | 63.8                |

|     |              |                      |                     |
|-----|--------------|----------------------|---------------------|
| L38 | C $\beta$    | 36.0                 | 35.8                |
|     | C $\gamma$ 1 | <b>28.2</b>          | <b>27.0</b>         |
|     | C $\gamma$ 2 | 15.8                 | 15.7                |
|     | C $\delta$   | 11.8                 | 11.7                |
|     | N            | <b>117.8</b>         | <b>117.1</b>        |
|     | CO           | 175.8                | 175.6               |
|     | C $\alpha$   | 56.1                 | 56.2                |
|     | C $\beta$    | <b>39.6s</b> , 36.8w | 39.7m, <b>37.0s</b> |
|     | C $\gamma$   | 25.2                 | 25.0                |
|     | C $\delta$ 1 | <b>22.3</b>          | <b>23.3</b>         |
|     | C $\delta$ 2 | <b>20.1</b>          | <b>21.2</b>         |

---
