# Supplementary material
Source: PubMed Central journal article supplement (PMC2234170)
Supplement: pnas_0711500105_5.pdf [file pnas_0711500105_5.pdf]

**Table 3.**  $^{13}\text{C}$  homogeneous  $T_2$  and apparent  $T_2^*$  (ms) of M2TMP in DLPC lipid bilayers without and with amantadine (Amt) at 303 K.  $T_2^*$  is obtained from the observed linewidths by  $T_2^* = 1/\pi\Delta^*$ .

| Residue | Site         | $T_2^*$ , - Amt | $T_2$ , - Amt | $T_2^*$ , + Amt | $T_2$ , + Amt |
|---------|--------------|-----------------|---------------|-----------------|---------------|
| L26     | C $\alpha$   | 1.0             | 1.4           | 1.8             | 2.1           |
|         | C $\beta$    | 1.8             | 1.8           | 2.6             | 3.0           |
|         | C $\delta$ 1 | 3.2             | 5.8           | 4.7             | 9.2           |
|         | C $\delta$ 2 | -               | -             | 3.7             | 8.4           |
| V27     | C $\alpha$   | 1.1             | 1.0           | 1.3             | 3.4           |
|         | C $\gamma$ 2 | 3.7             | 4.7           | 3.4             | 7.2           |
| A29     | C $\alpha$   | 1.1             | 1.3           | 2.0             | 2.5           |
|         | C $\beta$    | 2.1             | 5.2           | 2.2             | 9.0           |
| A30     | C $\alpha$   | 1.1             | 1.8           | 2.1             | 3.5           |
|         | C $\beta$    | 2.2             | 3.4           | 1.3             | 5.7           |
| I33     | C $\alpha$   | 1.1             | 1.0           | 1.4             | 3.4           |
|         | C $\gamma$ 2 | 2.2             | 3.4           | 1.3             | 4.6           |
|         | C $\delta$   | 3.7             | 4.8           | 3.0             | 5.6           |
| G34     | C $\alpha$   | 0.9             | 1.2           | 1.3             | 2.1           |
| I35     | C $\alpha$   | 1.4             | 1.9           | 2.3             | 2.1           |
|         | C $\beta$    | 1.9             | 2.1           | 2.9             | 2.6           |
|         | C $\gamma$ 2 | 2.1             | 2.1           | 2.2             | 3.4           |
|         | C $\delta$   | 3.5             | 4.9           | 4.1             | 7.1           |
| L38     | C $\alpha$   | 1.2             | 1.3           | 2.1             | 3.5           |
|         | C $\beta$    | 1.2             | 1.5           | 2.3             | 3.6           |
|         | C $\gamma$   | 2.6             | 2.7           | 2.1             | 3.5           |
|         | C $\delta$ 1 | 3.3             | 4.5           | 3.8             | 8.3           |
|         | C $\delta$ 2 | 3.7             | 4.7           | 3.0             | 8.0           |
| Average |              | 2.1             | 2.8           | 2.5             | 4.9           |
