# Supplementary material
Source: PubMed Central journal article supplement (PMC2234170)
Supplement: pnas_0711500105_6.pdf [file pnas_0711500105_6.pdf]

**Table 4.**  $^{13}\text{C}$  homogeneous  $T_2$  (ms) of M2TMP at 243 K and 303 K of M2TMP without and with amantadine (Amt).

| Residue | Site         | -Amt, 303 K | -Amt, 243 K | +Amt, 303 K | +Amt, 243 K |
|---------|--------------|-------------|-------------|-------------|-------------|
| L26     | C $\alpha$   | 1.4         | 3.0         | 2.1         | 2.8         |
|         | C $\beta$    | 1.8         | 1.8         | 3.0         | 1.5         |
|         | C $\gamma$   |             | 2.4         |             |             |
|         | C $\delta$ 1 | 5.8         | 3.0         | 9.2         |             |
|         | C $\delta$ 2 |             |             | 8.4         |             |
| V27     | C $\alpha$   | 1.0         | 2.8         | 3.4         | 3.0         |
|         | C $\beta$    |             | 2.4         |             | 2.5         |
|         | C $\gamma$ 2 | 4.7         | 4.0         | 7.2         | 4.7         |
| A29     | C $\alpha$   | 1.3         | 3.2         | 2.5         | 2.8         |
|         | C $\beta$    | 5.2         | 4.6         | 9.0         | 4.9         |
| A30     | C $\alpha$   | 1.8         | 2.8         | 3.5         | 3.2         |
|         | C $\beta$    | 3.4         | 5.1         | 5.7         | 7.2         |
| I33     | C $\alpha$   | 1.0         | 2.8         | 3.4         | 3.0         |
|         | C $\beta$    |             | 2.3         |             | 2.8         |
|         | C $\gamma$ 1 |             | 2.4         |             | 2.5         |
|         | C $\gamma$ 2 | 3.4         |             | 4.6         |             |
|         | C $\delta$   | 4.8         | 4.2         | 5.6         | 4.3         |
| G34     | C $\alpha$   | 1.2         | 3.2         | 2.1         | 2.6         |
| I35     | C $\alpha$   | 1.9         | 2.9         | 2.1         | 2.8         |
|         | C $\beta$    | 2.1         | 2.2         | 2.6         | 1.8         |
|         | C $\gamma$ 2 | 2.1         |             | 3.4         |             |
|         | C $\delta$   | 4.9         | 5.3         | 7.1         | 4.7         |
| L38     | C $\alpha$   | 1.3         | 2.9         | 3.5         | 3.2         |
|         | C $\beta$    | 1.5         | 1.9         | 3.6         | 2.2         |
|         | C $\gamma$   | 2.7         | 2.7         | 3.5         | 3.0         |
|         | C $\delta$ 1 | 4.5         | 4.0         | 8.3         | 4.7         |
|         | C $\delta$ 2 | 4.7         |             | 8.0         |             |
