# Supplementary material
Source: PubMed Central journal article supplement (PMC2234170)
Supplement: pnas_0711500105_7.pdf [file pnas_0711500105_7.pdf]

**Table 5.**  $^{13}\text{C}$  apparent line widths ( $\Delta^*$ ) and homogeneous line widths ( $\Delta$ ) (Hz) of M2TMP in DLPC bilayers at 243 K without and with amantadine (Amt). The apparent line widths  $\Delta^*$  ( $\pm 20$  Hz) are read off from 2D correlation spectra, while the homogeneous line widths  $\Delta$  are obtained from  $T_2$  measurements as  $\Delta = 1/\pi T_2$ . Sites of significant line width changes upon amantadine binding are bolded. Sites without entry are due to resonance overlap.

| Residue | site         | $\Delta^*$ , - Amt | $\Delta$ , - Amt | $\Delta^*$ , + Amt | $\Delta$ , + Amt |
|---------|--------------|--------------------|------------------|--------------------|------------------|
| L26     | C $\alpha$   | 170                | 100              | 200                | 110              |
|         | C $\beta$    | <b>410</b>         | 180              | <b>270</b>         | 200              |
| V27     | C $\alpha$   | 260                | 110              | 260                | 110              |
|         | C $\beta$    | 190                | 130              | 180                | 130              |
| A29     | C $\alpha$   | 160                | 100              | 140                | 110              |
|         | C $\beta$    | 240                | 70               | 240                | 70               |
| A30     | C $\alpha$   | 180                | 110              | 140                | 100              |
|         | C $\beta$    | <b>310</b>         | 60               | <b>160</b>         | 40               |
| I33     | C $\alpha$   | 300                | 110              | 300                | 110              |
|         | C $\beta$    | 260                | 140              | 230                | 110              |
|         | C $\gamma$ 1 | 360                | 130              | 370                | 130              |
|         | C $\gamma$ 2 | 310                |                  | 280                |                  |
| G34     | C $\alpha$   | <b>240</b>         | 100              | <b>180</b>         | 120              |
| I35     | C $\alpha$   | <b>250</b>         | 110              | <b>130</b>         | 120              |
|         | C $\beta$    | <b>240</b>         | 150              | <b>160</b>         | 180              |
|         | C $\gamma$ 1 | <b>290</b>         |                  | <b>170</b>         |                  |
|         | C $\gamma$ 2 | 210                |                  | 210                |                  |
|         | C $\delta$   | 210                | 60               | 170                | 70               |
| L38     | C $\alpha$   | 190                | 100              | 150                | 100              |
|         | C $\beta$    | <b>380</b>         | 160              | <b>200</b>         | 150              |
| Average |              | 258                | 113              | 207                | 115              |
