# Supplementary material
Source: PubMed Central journal article supplement (PMC2234170)

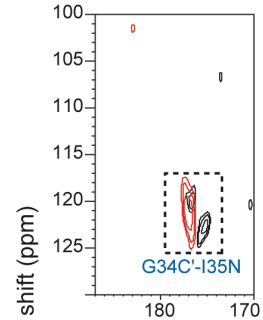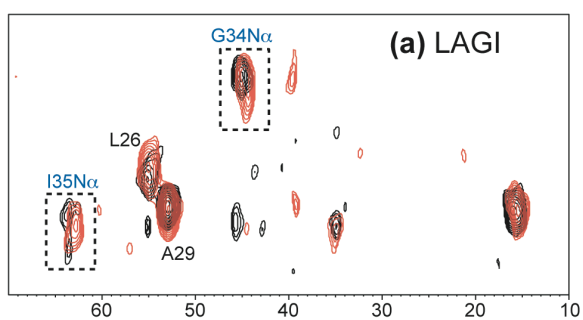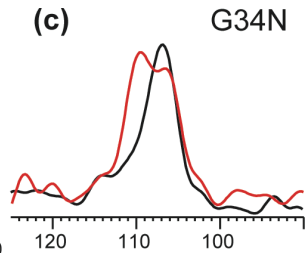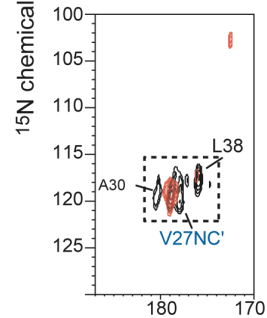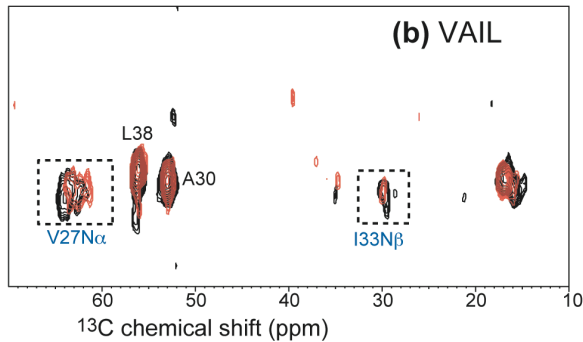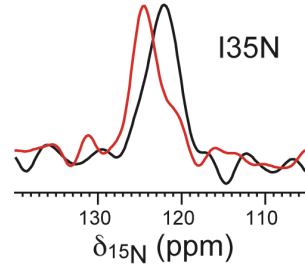

Supplement: pnas_0711500105_1.pdf [file pnas_0711500105_1.pdf]

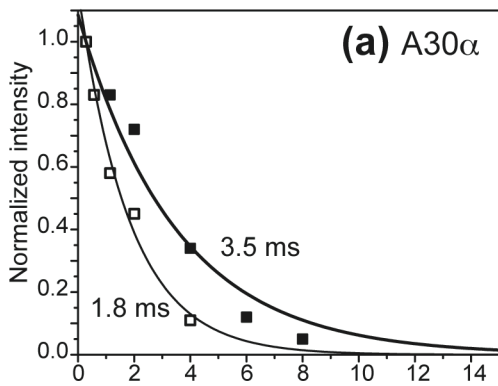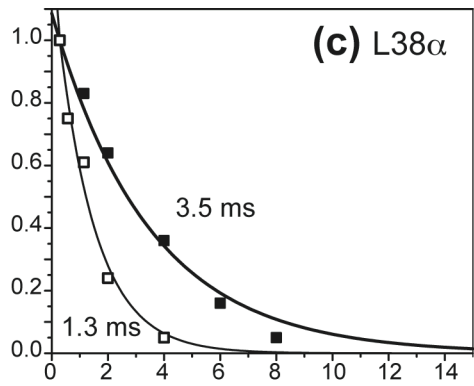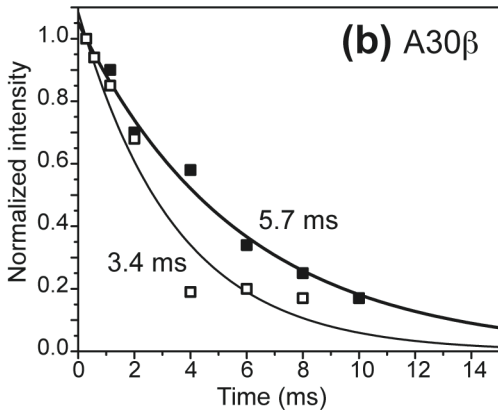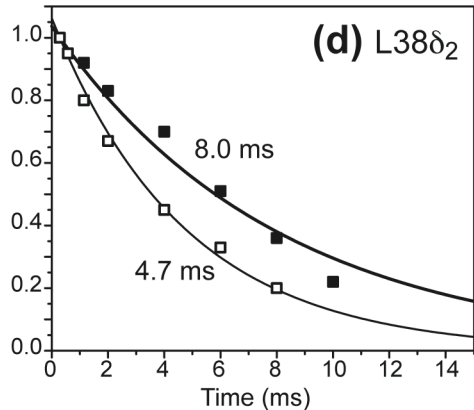

Supplement: pnas_0711500105_2.pdf [file pnas_0711500105_2.pdf]

**- Amt**

**+ Amt**

**(a)**

**(c)**

289 Hz

backbone

177 Hz

227 Hz

114 Hz

**(b)**

**(d)**

120 Hz

sidechain

86 Hz

114 Hz

55 Hz

400 200 0 -200 -400

frequency (Hz)

400 200 0 -200 -400

frequency (Hz)

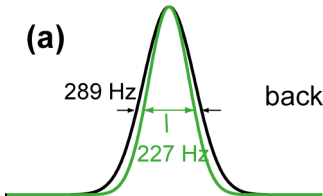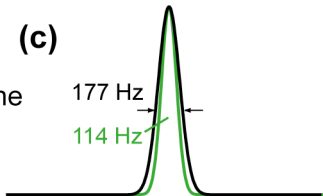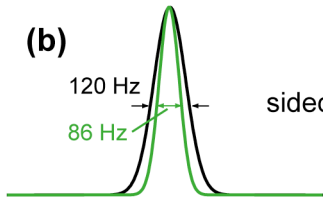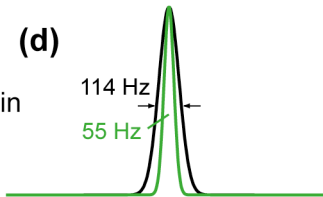

Supplement: pnas_0711500105_3.pdf [file pnas_0711500105_3.pdf]
